# Supplementary material for: Solitary wave characteristics on the fine structure of the mesospheric sporadic sodium layer
Source: Frontiers journal article supplement (doi:10.3389/fspas.2023.1241663), 2023-09-12
Supplement: Table_1.DOCX [file Table_1.DOCX]

Supplementary Material

Solitary wave characteristics on the fine structure of mesospheric sporadic sodium layer

Shican Qiu*, Mengxi Shi, Hamad Yousof, Willie Soon, Mingjiao Jia, Xianghui Xue, Tao Li, Peng Ju, Xiankang Dou

*** Correspondence:** Shican Qiu: scq@ustc.edu.cn and Xiankang Dou: dou@ustc.edu.cn

# Additional Supporting Information

Caption for Movie S1

Movie S1. A dynamic video of the variation of column vectors of  and  with time. Left: the simulation results denoted as matrix . Right: the net anomaly evolution of the NaS obtained by observation data matrix subtracting the Gaussian distribution model , denoted as . The numerical simulation results are in good agreement with the evolution process of the NaS.
